# Supplementary material for: Large Language Models in Radiology Exams: A Comparative Analysis of Performance in Turkish and English
Source: Research Square preprint supplement (doi:10.21203/rs.3.rs-8642109/v1), 2026-01-21
Supplement: Supplementary file 1 [file 2e8261498b28850d5de6c9f7.pdf]

Date: 19.10.2025

## Certification of Translation Accuracy

|                   |                                   |                 |                |
|-------------------|-----------------------------------|-----------------|----------------|
| Document Type:    | <b>MC Questions &amp; Answers</b> |                 |                |
| Translation Date: | <b>19.10.2025</b>                 | Order:          | <b>#424531</b> |
| Source Language:  | <b>English</b>                    | Target Language | <b>English</b> |

We, Protranslate, a professional online translation agency, hereby certify that the above-mentioned document has been translated by an experienced, certified, and competent professional translator and that, to the best of our knowledge, the translated document reflects the content, meaning, and style of the original document and is an accurate and complete translation of the original document.

This is to certify the accuracy of the translation only. We do not make any claims regarding the authenticity of the original document or its contents. In compliance with our Terms and Conditions, Protranslate assumes no liability for the manner in which the translation is used by the client or any other party.

A copy of the translation is attached herewith.

Regards,

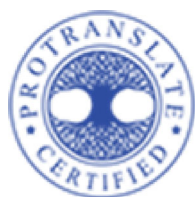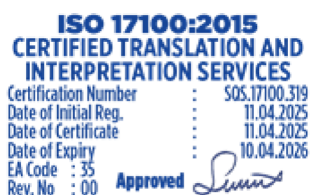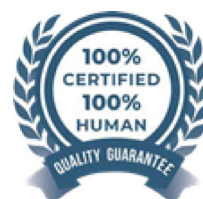

Protranslate Translation Services
