# Supplementary material for: Large Language Models in Radiology Exams: A Comparative Analysis of Performance in Turkish and English
Source: Research Square preprint supplement (doi:10.21203/rs.3.rs-8642109/v1), 2026-01-21
Supplement: Supplementary file 1 [file d3141b32373b6ce51cead551.docx]

31. Pectus excavatum için aşağıdakilerden hangisi doğrudur?

A. Vakaların %70'inde ailesel geçiş bildirilmiştir.

B. Down sendromu ile ilişkilidir.

C. Kadın baskınlığı vardır (kadın-erkek oranı 3:1).

D. Triküspid yetersizliği hastaların %20 ila 60'ında bildirilmiştir.

E. Pektus hastalarında anormal bir Haller indeksi olabilir.

31.* Which of the following is true for pectus excavatum?

A. A familial occurrence is reported in 70% of cases.

B. The condition is associated with Down syndrome.

C. There is a female predominance (a female-to-male ratio of 3:1).

D. Tricuspid regurgitation is reported in 20 to 60% of cases.

E. Pectus patients may have an abnormal Haller index

Cevap :E

32. Pulmoner nöroendokrin tümörler ile ilgili olarak aşağıdakilerden hangisi doğrudur?

A. Küçük hücreli akciğer karsinomu en sık görülen nöroendokrinel akciğer neoplazmıdır.

B. Diffüz idiyopatik nöroendokrin hücre hiperplazisi (DIPNECH) gibi nöroendokrin proliferasyonlar büyük kitleler olarak ortaya çıkar.

C. Büyük hücreli nöroendokrin karsinom (LCNEC) tipik olarak merkezi bir endobronşiyal pulmoner kitle olarak ortaya çıkar.

D. Pulmoner karsinoidli hastaların yaklaşık %25'inde Cushing sendromu bildirilmiştir.

E. Pulmoner karsinoidli hastaların yaklaşık %25'inde karsinoid sendromu bildirilmiştir.

32.* Regarding pulmonary neuroendocrine tumors, which ONE of the following is correct?

A. Small-cell lung carcinoma is the most common neuroendocrine lung neoplasm.

B. Neuroendocrine proliferations such as diffuse idiopathic neuroendocrine cell hyperplasia (DIPNECH) present as large masses.

C. Large-cell neuroendocrine carcinoma (LCNEC) typically presents as a central endobronchial pulmonary mass.

D. Cushing syndrome is reported in approximately 25% of patients with pulmonary carcinoid.

E. Carcinoid syndrome is reported in approximately 25% of patients with pulmonary carcinoid.

Cevap: A

33. Pulmoner venolobar sendrom ile ilgili aşağıdakilerden hangisi ya da hangileri DOĞRUDUR?

I. Sağ akciğerin diyaframın hemen üstünde veya altında IVC'ye parsiyel veya total anormal pulmoner venöz dönüşü olarak tanımlanır.

II. Luftsichel sendromu olarak da adlandırılır.

III. İlişkili anormallikler arasında anormal sağ akciğer lobasyonu ve sağ akciğer hipoplazisi bulunur.

IV. Scimitar veni vakaların %50'sinde görülür.

V. Çoğunluk sağ taraflıdır.

A. I, II, V

B. I, II, III, IV, V

C. I, III, IV, V

D. IV, V

E. II,IV, V

33. * Which of the following is TRUE regarding pulmonary venolobar syndrome?

I. Defined as the partial or total anomalous pulmonary venous return of the right lung to the IVC just above or below the diaphragm

II. Also called Luftsichel syndrome

III. Associated abnormalities include abnormal right lung lobation and right lung hypoplasia

IV. Scimitar vein is seen in 50% of cases

V. Majority are right-sided

A. I, II, V

B. I, II, III, IV, V

C. I, III, IV, V

D. IV, V

E. II, IV, V

Cevap: C

34. TUBERO SKLEROZ ile ilgili olarak aşağıdakilerden hangisi doğrudur?

A. Klasik triad nöbetler, mental retardasyon ve adenoma sebaseumu içerir.

B. Beyinde ilişkili görüntüleme bulgusu yoktur.

C. Renal hücreli karsinom riskinde belirgin bir artış vardır.

D. Pulmoner arteriyel hipertansiyon, mekonyum ileusu, pankreas yetmezliği ve siroz ile ilişkisi vardır.

34.* Regarding the TUBEROUS SCLEROSİS, which of the following is correct?

A. The classic triad includes seizures, mental retardation, and adenoma sebaceum.

B. There are no associated imaging findings in the brain.

C. There is a significantly increased risk of renal cell carcinoma.

D. There is an association with pulmonary arterial hypertension, meconium ileus, pancreatic insufficiency, and cirrhosis

CEVAP: A

35. Göğüs röntgeninde bronşiyal atrezinin EN sık görülen prezentasyonu nedir?

A. Hiperinflame lob

B. Perihiler nodül

C. Bronşektazi

D. Tübüler/dallanma opasite

35.* What is the MOST common presentation of bronchial atresia on chest X-ray?

A. Hyperinflated lobe

B. Perihilar nodule

C. Bronchiectasis

D. Tubular/branching opacity

Cevap: A

36. PANKOAST TÜMÖRÜ için EN yaygın klinik tablo nedir?

A. Hemoptizi

B. Omuz ağrısı

C. Horner sendromu

D. Plöritik göğüs ağrısı

36.* What is the MOST common clinical presentation for PANCOAST TUMOR?

A. Hemoptysis

B. Shoulder pain

C. Horner syndrome

D. Pleuritic chest pain

CEVAP: B

37. Hangi karakteristik özellik usual interstisyel pnömonitisi (UIP) nonspesifik interstisyel pnömoniden (NSIP) en iyi şekilde ayırır?

A. Şiddeti

B. Bronşektazi

C. Bal peteği

D. Buzlu cam opasitesi

37. * Which characteristic feature best differentiates UIP from nonspecific interstitial pneumonia (NSIP)?

A. Severity

B. Bronchiectasis

C. Honeycombing

D. Ground-glass opacity

CEVAP: C

38. *Which of the following cystic lung diseases is associated with renal cell carcinoma?

A. Pulmonary LCH

B. LIP

C. Birt-Hogg-Dube (BHD)

D. Erdheim-Chester disease

E. Sporadic LAM

38. Aşağıdaki kistik akciğer hastalıklarından hangisi renal hücreli karsinom ile ilişkilidir?

A. Pulmoner LCH

B. LIP

C. Birt-Hogg-Dube (BHD)

D. Erdheim-Chester hastalığı

E. Sporadik LAM

Cevap: C

39.* Which ONE of the following statements is true for Partial anomalous pulmonary venous return? (PAPVR)

A. Approximately 80% of patients with right-sided PAPVR have an atrial septal defect (ASD).

B. PAPVR is a cyanotic left-to-right shunt.

C. The anomalous pulmonary vein drains into the right-sided circulation.

D. Surgical correction is always the treatment of choice.

E. Scimitar syndrome is the type of PAPVR most often associated with ASD.

39. Parsiyel Anormal Pulmoner Venöz Dönüş (PAPVR) için aşağıdaki ifadelerden hangisi doğrudur?

A. Sağ taraflı PAPVR'si olan hastaların yaklaşık %80'inde atriyal septal defekt (ASD) vardır.

B. PAPVR siyanotik bir soldan sağa şanttır.

C. Anormal pulmoner ven sağ taraftaki dolaşıma drene olur.

D. Cerrahi düzeltme her zaman tercih edilen tedavidir.

E. Scimitar sendromu, ASD ile en sık ilişkilendirilen PAPVR tipidir.

Cevap: C

40.* The thoracic surgeon wants an assessment of local chest wall or diaphragmatic invasion. What test would you recommend?

A. 18-FDG PET/CT

B. Magnetic resonance imaging (MRI) with gadolinium

C. Percutaneous biopsy

D. Chest CT

E. Ultrasound

40.Göğüs cerrahı lokal göğüs duvarı veya diyafragma invazyonunun değerlendirilmesini istiyor. Hangi testi önerirsiniz?

A. 18-FDG PET/BT

B. Gadolinyum ile manyetik rezonans görüntüleme (MRI)

C. Perkütan biyopsi

D. Göğüs BT

E. Ultrason

Cevap: B

41.* Which ONE of the following is NOT associated with SOLITARY FIBROUS TUMOR?

A. Hyperglycemia

B. Wrist pain

C. Chest wall invasion

D. Pleural effusion

E. Diaphragmatic invasion

41. Aşağıdakilerden hangisi SOLİTER FİBROUS TÜMÖR ile ilişkili DEĞİLDİR?

A. Hiperglisemi

B. Bilek ağrısı

C. Göğüs duvarı invazyonu

D. Plevral efüzyon

E. Diyafragma invazyonu

CEVAP: A

42. * Which ONE of the following statements is true for Allergic bronchopulmonary aspergillosis (ABPA)?

A. The “air crescent” sign develops in invasive aspergillosis as the host's immunity recovers.

B. A mycetoma occurs in immunocompromised patients.

C. Bronchiolectasis is the most prominent finding in ABPA.

D. Traction bronchiectasis results from an intrinsic defect within the airway wall.

42. Allerjik bronkopulmoner aspergillozda (ABPA) aşağıdaki ifadelerden hangisi doğrudur?

A. İnvaziv aspergillozda konakçı bağışıklığı iyileştikçe “hava hilali” işareti gelişir.

B. Bağışıklık sistemi baskılanmış hastalarda miketoma oluşur.

C. Bronşiyolektazi ABPA'da en belirgin bulgudur.

D. Traksiyon bronşektazisi hava yolu duvarındaki intrinsik bir defektten kaynaklanır.

CEVAP: A

43.* There are several pulmonary nodules with halo signs and enlarged bilateral hilar nodes on a noncontrast chest computed tomography. You also notice that the patient has an elevated angiotensin-converting enzyme level. Which disease does this patient MOST likely have?

A. Granulomatosis with polyangiitis

B. Churg-Strauss syndrome

C. Pulmonary Kaposi sarcoma

D. Sarcoidosis

43. Kontrastsız göğüs bilgisayarlı tomografisinde halo işaretli birkaç pulmoner nodül ve genişlemiş bilateral hiler düğümler var. Ayrıca hastanın anjiyotensin dönüştürücü enzim seviyesinin yüksek olduğunu fark ettiniz. Bu hastada büyük olasılıkla hangi hastalık vardır?

A. Polianjiitis granülomatosis

B. Churg-Strauss sendromu

C. Pulmoner Kaposi sarkomu

D. Sarkoidoz

Cevap: D

44. In which disease is the cobblestone sign in the lung not seen?

A. Pulmonary edema

B. Pulmonary hemorrhage

C. Sarcoidosis

D. Pulmonary alveolar proteinosis (PAP)

44. Akciğerde arnavut kaldırımı belirtisi hangi hastalıkta görülmez?

A. Akciğer ödemi

B. Akciğer kanaması

C. Sarkoidoz

D. Pulmoner alveolar proteinoz (PAP)

Cevap: C

45. * Which of the following is not included in the differential diagnosis for multiple cavitary lesions?

A. Septic embolism

B. Granulamatosis with polyangiitis

C. Metastasis

D. Pneumoconiosis

45. Aşağıdakilerden hangisi multipl kaviter lezyonların ayırıcı tanısında yer almaz?

A. Septik emboli

B. Polianjitis granülamatozis

C. Metastaz

D. Pnömokonyoz

Cevap: D

46. * Select the wrong option for pulmonary involvement in sarcoidosis.

A. Stage 0, Normal radiograph.

B. Stage 1, Hilar or mediastinal adenopathy only without lung changes.

C. Stage 2, Adenopathy with lung changes.

D. Stage 3, End-stage fibrosis.

46. Sarkoidozun akciğer tutulum için yanlış olan şıkkı seçiniz?

A. Evre 0, Normal radyografi.

B. Evre 1, Akciğer değişiklikleri olmadan sadece hiler veya mediastinal adenopati.

C. Evre 2, Akciğer değişiklikleri ile birlikte adenopati.

D. Evre 3, Son evre fibroz.

Cevap: D

47.* Choose the wrong one for lung signs.

A. Luftsichel sign is seen in left upper lobe atelectasis.

B. Golden S sign is seen in right upper lobe atelectasis.

C. The silhouette sign is a sign of left middle lobe atelectasis.

D. The flat waist sign describes the flattening of the left heart border due to the posterior shift of the hilar structures and cardiac rotation.

47. Akciğer işaretleri için yanlış olanı seçiniz?

A. Sol üst lob atelektazisinde luftsichel işareti görülür.

B. Sağ üst lob atelektazisinde Golden S işareti görülür.

C. Siluet işareti sol orta lob atelektazisi bulgusudur.

D. Düz bel işareti hiler yapıların arkaya kayması ve bunun kardiyak rotasyon nedeniyle sol kalp sınırının düzleşmesini tanımlar.

CEVAP: C

48.* Which one is not included in the differential diagnosis of chronic consolidation?

I. Adenocarcinoma, primarily bronchioloalveolar carcinoma

II. Pulmonary edema

II. Lymphoma

IV. Organized pneumonia

V. Solitary nodul

A. I, II, III

B. II, V

C. IV, V

D. III, IV, V

E. I, II, III, IV, V

48. Kronik konsolidasyon ayırıcı tanısında hangisi yer almaz?

I. Adenokarsinom, öncelikle bronşiyoloalveoler karsinom

II. Pulmoner ödem

III. Lenfoma.

IV. Organize pnömoni

V. Solitary nodül

A. I, II, III

B. II, V

C. IV, V

D. III, IV, V

E. I, II, III, IV, V

Cevap: B

49.* Regarding interstitial lung disease, which of the following statements are correct?

I. Cryptogenic organising pneumonia (COP) may present with CT findings similar to those of chronic eosinophilic pneumonia

II. Ground glass opacities are commonly seen in non-specific interstitial pneumonitis (NSIP)

III. Cryptogenic organising pneumonia (COP) is associated with cigarette smoking

IV. In patients with subacute hypersensitivity pneumonitis (HP), centrilobular nodules can be seen

V. In the fibrotic phase of acute respiratory distress syndrome (ARDS), changes are most severe in the dependent part of the lungs

A. I, II, IV

B. III, IV, V

C. I, II

D. II, IV

E. I, II, III, IV

49. İnterstisyel akciğer hastalığı ile ilgili olarak aşağıdaki ifadelerden hangisi doğrudur?

A. Kriptojenik organize pnömoni (COP), kronik eozinofilik pnömoniye benzer BT bulguları ile ortaya çıkabilir

B. Buzlu cam opasiteleri spesifik olmayan interstisyel pnömonide (NSIP) yaygın olarak görülür

C. Kriptojenik organize pnömoni (COP) sigara içimi ile ilişkilidir

D. Subakut hipersensitivite pnömonisi (HP) olan hastalarda sentrilobüler nodüller görülebilir

E. Akut solunum sıkıntısı sendromunun (ARDS) fibrotik fazında, değişiklikler akciğerlerin dependan kısmında en şiddetlidir.

A. I, II, IV

B. III, IV, V

C. I, II

D. II, IV

E. I, II, III, IV

Cevap: A

50.* Regarding the anatomy of the airways, which of the following statements are correct?

I. The left main bronchus is wider and more vertical than the right main bronchus

II The posterior aspect of the trachea is formed of cartilage

III. The trachea usually bifurcates at the level of thoracic vertebra 4-5

IV. The left main bronchus lies below the left pulmonary artery

V. The lingular segmental bronchus forms part of the left lower lobe

A. I, II, IV

B. III, IV

C. IV, V

D. I, II, III, IV, V

E. I, II, III

50. Hava yollarının anatomisi ile ilgili olarak aşağıdaki ifadelerden hangisi YA DA HANGİLERİ doğrudur?

I. Sol ana bronş sağ ana bronştan daha geniş ve daha dikeydir.

II. Trakeanın arka tarafı kıkırdaktan oluşur.

III. Trakea genellikle torasik vertebra 4-5 seviyesinde çatallanır.

IV. Sol ana bronş sol pulmoner arterin altında yer alır.

V. Lingular segmental bronş sol alt lobun bir bölümünü oluşturur.

A. I, II, IV

B. III, IV

C. IV, V

D. I, II, III, IV, V

E. I,II,III

Cevap:B

51.* Which of the following appearances might be expected for carcinoid metastases in the liver?

A. Arterial hypoenhancement

B. Uptake of hepatocyte-specific contrast agents

C. Predominantly necrotic mass

D. Portal venous phase isoattenuation

51. Karaciğerdeki karsinoid metastazları için aşağıdaki görünümlerden hangisi beklenebilir?

A. Arteriyel hipoenhancement

B. Hepatosit spesifik kontrast maddelerin alımı

C. Ağırlıklı olarak nekrotik kitle

D. Portal venöz faz izoattenüasyonu

Cevap: D

52.* What is the most common location for gastrointestinal stromal tumor?

A. Esophagus

B. Stomach

C. Small bowel

D. Colon

E. Pancreas

52. Gastrointestinal stromal tümörün en sık görüldüğü yer neresidir?

A. Özofagus

B. Mide

C. İnce bağırsak

D. Kolon

E. Pankreas

Cevap: B

53.* What is the most common cause of shock gut finding?

A. Obstruction

B. Volume overload

C. Contrast reaction

D. Acute severe blood loss

53. Şok bağırsak bulgusunun en yaygın nedeni nedir?

A. Obstrüksiyon

B. Aşırı hacim yüklemesi

C. Kontrast reaksiyonu

D. Akut ciddi kan kaybı

Cevap: D

54.* Which is true about colocolonic intussusception in adult patients?

A. Often self-limited

B. Usually associated with adhesions

C. Most often caused by a benign mass

D. Most often caused by adenocarcinoma in adults

54. Erişkin hastalarda kolokolonik invajinasyon hakkında hangisi doğrudur?

A. Genellikle kendi kendini sınırlar

B. Genellikle yapışıklıklar ile ilişkilidir

C. Çoğu zaman iyi huylu bir kitleden kaynaklanır

D. Yetişkinlerde en sık adenokarsinomdan kaynaklanır

Cevap: D

55.* Which ONE of the following statements is true for acute superior mesenteric vein thrombosis?

A. It has a low mortality.

B. It is most commonly idiopathic.

C. Resultant bowel involvement is usually segmental.

D. The inferior mesenteric vein is more commonly involved

than the superior mesenteric vein.

55. Akut süperior mezenterik ven trombozu için aşağıdaki ifadelerden hangisi doğrudur?

A. Düşük mortaliteye sahiptir.

B. En sık idiyopatiktir.

C. Oluşan bağırsak tutulumu genellikle segmentaldir.

D. İnferior mezenterik ven, superior mezenterik venden daha sık tutulur.

Cevap: C

56. * Which of the following is a potential etiology of Epiploic appendagitis?

A. Torsion

B. Luminal occlusion

C. Autoimmune

D. Infection

E. Adhesion

56. Aşağıdakilerden hangisi Epiploik apendajitin potansiyel etiyolojisidir?

A. Torsiyon

B. Luminal oklüzyon

C. Otoimmün

D. Enfeksiyon

E. Adezyon

Cevap: A

57. * Which ONE of the following is true regarding the management of sigmoid volvulus?

A. There is no role for barium enema.

B. Rectal tube decompression may be therapeutic.

C. Surgical intervention is required for treatment.

D. Nasogastric decompression is indicated.

57. Sigmoid volvulus tedavisi ile ilgili olarak aşağıdakilerden hangisi doğrudur?

A. Baryum enemanın tedavide yeri yoktur.

B. Rektal tüp dekompresyonu tedavi edici olabilir.

C. Tedavi için cerrahi müdahale gereklidir.

D. Nazogastrik dekompresyon endikedir.

Cevap: B

58. * All of the following are part of Rigler’s triad on radiographs, EXCEPT:

A. Ectopic location of gallstone

B. Pneumobilia

C. Free intra-abdominal air

D. Small bowel obstruction

58. Aşağıdakilerin tümü radyografilerde Rigler üçlüsünün bir parçasıdır, biri HARİÇ:

A. Safra taşının ektopik yerleşimi

B. Pnömobilia

C. Karın içi serbest hava

D. İnce bağırsak tıkanıklığı

Cevap: C

59. * Which ONE of the following is true regarding solid pseudopapillary tumors of the pancreas?

A. The most common site of spread is the lung.

B. These lesions are typically benign.

C. The most common location for the primary lesion is the pancreatic body.

D. The average size of the primary tumor at diagnosis is under 3 cm.

59. Pankreasın solid psödopapiller tümörleri ile ilgili aşağıdakilerden hangisi doğrudur?

A. En yaygın yayılma bölgesi akciğerdir.

B. Bu lezyonlar tipik olarak iyi huyludur.

C. Primer lezyonun en sık görüldüğü yer pankreas gövdesidir.

D. Tanı sırasında primer tümörün ortalama boyutu 3 cm'nin altındadır.

Cevap: B

60.* Hepatocyte-specific contrast is superior to other intracellular contrast agents for the diagnosis of which ONE of the following lesions?

A. Hepatocellular carcinoma

B. Focal nodular hyperplasia

C. Focal fatty deposition

D. Hemangioma

E. Hepatic adenoma

60. Hepatosit spesifik kontrast aşağıdaki lezyonlardan hangisinin tanısında diğer hücre içi kontrast maddelere göre daha üstündür?

A. Hepatoselüler karsinom

B. Fokal nodüler hiperplazi

C. Fokal yağ birikimi

D. Hemanjiyom

E. Hepatik Adenom

Cevap: B

61.* What is the most common complication after gastric band surgery?

A. Band slippage

B. Malpositioned band

C. Pouch dilatation

D. Perforation

61. Mide bandı ameliyatından sonra en sık görülen komplikasyon nedir?

A. Bant kayması

B. Yanlış konumlandırılmış bant

C. Kese dilatasyonu

D. Perforasyon

Cevap: B

62. * Which of the following is used as the anatomic reference point of the pelvic floor on MRI?

A. H line

B. M line

C. Pubococcygeal line

D. Puborectalis muscle

62. Aşağıdakilerden hangisi MRG'de pelvik tabanın anatomik referans noktası olarak kullanılır?

A. H çizgisi

B. M hattı

C. Pubococcygeal çizgi

D. Puborektalis kası

Cevap: C

63. * Which ONE of the following statements is true for serous cystadenomas?

A. They should always be resected.

B. Associated pancreatic ductal dilatation is common.

C. Cysts within the lesion are typically 2 cm in size.

D. A fibrous central scar with or without calcification can be seen.

63. Seröz kistadenomlar için aşağıdaki ifadelerden hangisi doğrudur?

A. Her zaman rezeke edilmelidirler.

B. İlişkili pankreatik duktal dilatasyon yaygındır.

C. Lezyon içindeki kistler tipik olarak. 2 cm büyüklüğündedir.

D. Kalsifikasyonlu veya kalsifikasyonsuz fibröz bir merkezi skar görülebilir.

Cevap: D

64. * There is a 5.3cm renal angiomyolipoma mass in the left kidney. What is the best option for treatment?

A. Conservative management with 6-month follow up imaging

B. None, as this lesion is benign

C. Embolization/ablation

D. Surgical excision

64. Sol böbrekte 5.3 cm büyüklüğünde renal anjiyomiyolipom tanılı kitlesi var. Tedavi için en iyi seçenek nedir?

A. Altı aylık görüntüleme takibi ile konservatif tedavi

B. Hiçbiri, çünkü bu lezyon iyi huyludur

C. Embolizasyon/ablasyon

D. Cerrahi eksizyon

Cevap: C

65.* What is the MOST likely complication associated with mature ovarian teratoma?

A. Malignant transformation

B. Hemorrhage

C. Ovarian torsion

D. Rupture

65. Matür over teratomu ile ilişkili EN olası komplikasyon nedir?

A. Malign transformasyon

B. Kanama

C. Over torsiyonu

D. Rüptür

Cevap: C

66. * What is the MOST appropriate management of intraperitoneal bladder rupture?

A. Close observation with serial imaging

B. Surgery with bladder repair

C. Radical cystectomy

D. Foley catheter placement

66. İntraperitoneal mesane rüptüründe EN UYGUN yönetimi nedir?

A. Seri görüntüleme ile yakın gözlem

B. Mesane onarımı ile ameliyat

C. Radikal sistektomi

D. Foley kateter yerleştirme

Cevap: B

67.* What is the MOST important magnetic resonance imaging (MRI) sequence for making urethral diverticulum diagnosis?

A. T2-weighted sequence

B. T1-weighted sequence

C. Contrast-enhanced T1-weighted sequence

D. Diffusion-weighted imaging

E. T1 fat saturated images

67. Üretral divertikül tanısı koymak için EN önemli manyetik rezonans görüntüleme (MRG) sekansı hangisidir?

A. T2 ağırlıklı sekans

B. T1 ağırlıklı sekans

C. Kontrastlı T1 ağırlıklı sekans

D. Difüzyon ağırlıklı görüntüleme

E. T1 yağ baskılı imajlar

Cevap: A

68.* Metachronous tumors of the urinary tract are most common with:

A. Bladder transitional cell carcinoma

B. Upper urinary tract transitional cell carcinoma

C. Urethral transitional cell carcinoma

D. Renal cell carcinoma

E. Renal chromophobe cell tumor

68. İdrar yollarının metakron tümörleri en sık aşağıdakilerden hangisinde görülür?

A. Mesane transizyonel hücreli karsinomu

B. Üst üriner sistem transizyonel hücreli karsinomu

C. Üretral transizyonel hücreli karsinom

D. Renal hücreli karsinom

E. Renal kromofob hücreli tümör

Cevap: B

69.* In a duplicated collecting system, which system typically refluxes and which system obstructs?

A. Upper pole both obstructs and refluxes

B. Lower pole obstructs and upper pole refluxes

C. Upper pole obstructs and lower pole refluxes

D. Lower pole both obstructs and refluxes

E. Upper pole obstructs, both upper and lower poles reflux

69. Böbrekte Duplike toplayıcı sistem varsa, tipik olarak hangi sistem reflü yapar ve hangi sistem tıkanır?

A. Üst kutup hem tıkar hem de reflü yapar

B. Alt kutup tıkar ve üst kutup reflü yapar

C. Üst kutup tıkar ve alt kutup reflü yapar

D. Alt kutup hem tıkar hem de reflü yapar

E. Üst kutup tıkar, hem alt hem üst kutup reflü yapar

Cevap: C

70.* Unilateral renal agenesis is commonly associated with which of the following? Choose ALL that are correct.

I. Caroli disease

II. Chromosomal anomalies

III. Müllerian duct anomalies

IV. Budd-Chiari syndrome

V. Autosomal dominant polycystic kidney diseases

A. II, III

B. I, II, III, IV, V

C. III, IV

D. I, II, III

E. II

70. Tek taraflı renal agenezi genellikle aşağıdakilerle ilişkilidir aşağıdakilerden hangisi? Doğru olan TÜMÜNÜ seçiniz.

A. Karoli hastalığı

B. Kromozomal anomaliler

C. Müllerian kanal anomalileri

D. Budd-Chiari sendromu

E. Otozomal dominant polikistik böbrek hastalığı

A. II, III

B. I, II, III, IV, V

C. III, IV

D. I, II, III

E. II

Cevap: A

71. * Uterine fibroid embolization (UFE) is typically performed using which type of embolic material?

A. Coils

B. Glue

C. Ethanol

D. Particles

E. Absorbable gelatin sponge

71. Uterin fibroid embolizasyonu (UFE) tipik olarak hangi tip embolik materyal kullanılarak gerçekleştirilir?

A. Koiller

B. Glue

C. Etanol

D. Partikül

E. Emilebilir jelatin sünger

Cevap: D

72.* Which pseudoaneurysm characteristics are most amenable to safe treatment with thrombin injection?

A. Short, wide neck

B. Long, wide neck

C. Long, narrow neck

D. Short, narrow neck

E. All of the above

72. Hangi psödoanevrizma özellikleri trombin enjeksiyonu ile güvenli tedaviye en uygundur?

A. Kısa, geniş boyun

B. Uzun, geniş boyun

C. Uzun, dar boyun

D. Kısa, dar boyun

E. Yukarıdakilerin hepsi

Cevap: C

73.* In patients with more than one left renal vein, which one is the preferred position for placement of an IVC filter? (Select the best answer.)

A. In between the renal veins

B. In the right iliac vein

C. Over the ostium of the superior renal vein

D. In the left iliac vein

E. Below the lowest renal vein

73. Birden fazla sol renal veni olan hastalarda, IVC filtresinin yerleştirilmesi için tercih edilen pozisyon nedir? (En iyi BİR cevabı seçin.)

A. Renal venler arasına

B. Sağ iliak vene

C. Üst renal ven ostiumunun üzerine

D. Sol iliak vene

E. En alt renal venin altına

Cevap: e

74. * In the event of contrast extravasation after angioplasty of a fistula, which ONE of the following is an appropriate initial maneuver?

A. Placing a tourniquet in the axillary region

B. Putting up a balloon at the site of rupture

C. Placing coils at the site of rupture

D. Injecting thrombin at the site of rüptüre

E. Placing a tourniquet proximal to the rüptüre

74. Bir fistülün anjiyoplastisinden sonra kontrast ekstravazasyonu gelişirse, aşağıdakilerden hangisi uygun bir ilk manevradır?

A. Aksiller bölgeye turnike yerleştirmek

B. Rüptür bölgesine bir balon yerleştirmek

C. Rüptür bölgesinde koil yerleştirilmesi

D. Rüptür bölgesine trombin enjekte edilmesi

E: Rüptür proksimaline turnike yerleştirmek

Cevap: B

75.* Which ONE of the following is a potential advantage of a tagged red blood cell scan over a computerized angiography for a gastrointestinal bleed?

A. Detection of slower bleeding rates

B. Precise anatomic bleed localization

C. Detailed depiction of arterial anatomy

D. Shorter acquisition time

E. More readily available

75. Aşağıdakilerden hangisi gastrointestinal kanama için bilgisayarlı tomografi anjiyografisine kıyasla etiketlenmiş kırmızı kan hücresi taramasının potansiyel bir avantajıdır?

A. Daha yavaş kanama oranlarının tespiti

B. Hassas anatomik kanama lokalizasyonu

C. Arteriyel anatominin ayrıntılı tasviri

D. Daha kısa edinim süresi

E. Daha kolay erişilebilir

Cevap: A

76* If patients with a diagnosis of median arcuate ligament are symptomatic, what is the first-line treatment for them?

A. Surgery

B. Endovascular stent placement

C. Celiac ganglion block

D. Medical management

E. No treatment

76. Median arkuat ligament tanılı hastalar semptomatik ise bu hasta için ilk basamak tedavi nedir?

A. Ameliyat

B. Endovasküler stent yerleştirme

C. Çölyak gangliyon bloğu

D. Tıbbi yönetim

E. Tedavi yok

Cevap: A

77.* What is the best treatment strategy for May -Thurner syndrome?

A. Endovascular techniques, including angioplasty with possible stent placement

B. Surgical management

C. Conservative management

D. Systemic anticoagulation alone

E. More workup is needed before a treatment plan can be made

77. May -Thurner sendromu için en iyi tedavi stratejisi nedir?

A. Olası stent yerleştirme ile anjiyoplasti dahil endovasküler teknikler

B. Cerrahi yönetim

C. Konservatif yönetim

D. Tek başına sistemik antikoagülasyon

E. Bir tedavi planı oluşturulmadan önce daha fazla çalışma yapılması gerekiyor

Cevap: B

78.* What is the most common sequela of Nutcracker syndrome?

A. Thrombosis

B. Renal failure

C. Left varicocele

D. Premature menopause

E. Malignancy

78. Nutcracker sendromunun en sık görülen sekeli nedir?

A. Tromboz

B. Böbrek yetmezliği

C. Sol varikosel

D. Erken menopoz

E. Malignite

Cevap: C

79.* Which ONE of the following is the generally preferred route for an infected deep pelvic collection drainage in a female patient (assuming the collection is accessible without traversal of vital structures)?

A. Transgluteal

B. Transabdominal

C. Transrectal

D. Transvaginal

E. Due to location, percutaneous drainage should be avoided.

79. Kadın bir hastada enfekte derin pelvik koleksiyon drenajı için genellikle tercih edilen yol aşağıdakilerden hangisidir (koleksiyonun hayati yapıları geçmeden erişilebilir olduğu varsayılırsa)?

A. Transgluteal

B. Transabdominal

C. Transrektal

D. Transvajinal

E. Konum nedeniyle perkütan drenajdan kaçınılmalıdır.

Cevap: D

80.* Which patient factor is particularly important to consider prior to percutaneous nephrostomy placement?

A. Airway assessment

B. White blood cell count

C. Heart rate

D. Blood pressure

E. Allergies

80. Perkütan nefrostomi yerleştirilmeden önce hangi hasta faktörünün göz önünde bulundurulması özellikle önemlidir?

A. Hava yolu değerlendirmesi

B. Beyaz kan hücresi sayımı

C. Kalp atış hızı

D. Kan basıncı

E. Alerjiler

Cevap: A

81.*Which of the following comprises the clinical symptoms that can be seen from brainstem injury due to osmotic demyelination syndrome (central pontine myelinolysis)?

A. Quadriplegia, dysarthria, dysphagia, lethargy

B. Quadriplegia, dysarthria, dysphagia, tremor

C. Diplopia, dysarthria, dysphagia, tremor

D. Locked-in syndrome, dysarthria, dysphagia, tremor

E. Amnesia, dysarthria, dysphagia, tremor

81. Aşağıdakilerden hangisi ozmotik demiyelinizasyon sendromuna (santral pontin miyelinolizis) bağlı beyin sapı hasarında görülebilecek klinik semptomları içerir?

A. Kuadripleji, dizartri, disfaji, letarji

B. Kuadripleji, dizartri, disfaji, tremor

C. Diplopi, dizartri, disfaji, tremor

D. Locked-in sendromu, dizartri, disfaji, tremor

E. Amnezi, dizartri, disfaji, tremor

Cevap: A

82.* What is the name for the finding of serpiginous cortical T1 hyperintensity that is often seen with subacute infarcts?

A. Cortical ribboning

B. Cortical laminar necrosis

C. Cortical tram-track sign

D. Cortical rim sign

E. Transmantle sign

82. Subakut enfarktlarda sıklıkla görülen serpiginöz kortikal T1 hiperintensite bulgusuna ne ad verilir?

A. Kortikal şeritleşme

B. Kortikal laminar nekroz

C. Kortikal tram-track işareti

D. Kortikal kenar işareti

E. Transmantle işareti

Cevap: B

83.* Which of the following is an immune-mediated microvascular endothelial disorder characterized by the following clinical triad: encephalopathy, sensorineural hearing loss, and vision impairment?

A. Multiple sclerosis

B. Acute disseminated encephalomyelitis

C. Neuromyelitis optica

D. Progressive multifocal leukoencephalopathy

E. Susac syndrome

83. Aşağıdakilerden hangisi ensefalopati, sensörinöral işitme kaybı ve görme bozukluğu klinik triadı ile karakterize immün aracılı mikrovasküler endotelyal bir hastalıktır?

A. Multipl skleroz

B. Akut dissemine ensefalomiyelit

C. Nöromiyelit optika

D. Progresif multifokal lökoensefalopati

E. Susac sendromu

Cevap: E

84.* In the vast majority of cases, what is the BEST management for petrous apex cephaloceles?

A. Nothing

B. Short-term imaging follow up

C. Biopsy

D. Surgical resection

E. Radiation therapy

84. Vakaların büyük çoğunluğunda, petröz apeks sefaloselleri için EN İYİ yönetim nedir?

A. Hiçbir şey

B. Kısa süreli görüntüleme takibi

C. Biyopsi

D. Cerrahi rezeksiyon

E. Radyasyon tedavisi

Cevap: A

85. What is the MOST common clinical presentation of thoracic spinal cord herniation?

A. Radiculopathy

B. Loss of upper extremity pain and temperature sensation

C. Ascending paralysis

D. Central cord syndrome

E. Brown-Séquard syndrome

85. Torasik omurilik herniasyonunun EN sık görülen klinik tablosu nedir?

A. Radikülopati

B. Üst ekstremite ağrı ve sıcaklık hissi kaybı

C. Yükselen felç

D. Merkezi kord sendromu

E. Brown-Séquard sendromu

Cevap: E

86.* Radiation necrosis commonly occurs within which of the following time periods following radiotherapy?

A. Within one day

B. One day to one week

C. One week to one month

D. One to three months

E. Three months and beyond

86. Radyasyon nekrozu genellikle radyoterapi sonrası aşağıdaki zaman dilimlerinden hangisinde ortaya çıkar?

A. 1 gün içinde

B. Bir gün ila bir hafta

C. Bir hafta ila bir ay

D. Bir ila üç ay

E. Üç ay ve sonrası

Cevap: E

87.* Of the following autoantibodies that can be found in the serum or cerebrospinal fluid in patients with paraneoplastic syndromes, which is the LEAST likely to be associated with a tumor?

A. Anti-Hu

B. Anti-voltage-gated potassium channel

C. Anti-Ri

D. Anti-Ma2

E. Anti-N-methyl-D-aspartate receptor

87. Paraneoplastik sendromlu hastalarda serum veya beyin omurilik sıvısında bulunabilen aşağıdaki otoantikorlardan hangisinin bir tümörle ilişkili olma olasılığı EN AZDIR?

A. Anti-Hu

B. Anti-voltaj kapılı potasyum kanalı

C. Anti-Ri

D. Anti-Ma2

E. Anti-N-metil-D-aspartat reseptörü

Cevap: B

88.* What is the classic clinical triad of cerebral fat embolism?

A. Neurologic dysfunction, respiratory distress, renal dysfunction

B. Neurologic dysfunction, respiratory distress,petechial skin rash

C. Neurologic dysfunction, respiratory distress, cardiac abnormalities

D. Neurologic dysfunction, renal dysfunction, deep venous thrombosis

E. Neurologic dysfunction, deep venous thrombosis,anasarca

88.Serebral yağ embolisinde hastalığın klasik klinik triadı nedir?

A. Nörolojik fonksiyon bozukluğu, solunum sıkıntısı, böbrek fonksiyon bozukluğu

B. Nörolojik işlev bozukluğu, solunum sıkıntısı, peteşiyal deri döküntüsü

C. Nörolojik disfonksiyon, solunum sıkıntısı, kardiyak anormallikler

D. Nörolojik işlev bozukluğu, böbrek işlev bozukluğu, derin venöz tromboz

E. Nörolojik disfonksiyon, derin venöz tromboz, anasarca

Cevap: B

89.* Which of the following is NOT a treatment for hyperammonemia?

A. Lactulose

B. Increase protein intake

C. Hemodialysis

D. Increase caloric intake of glucose and lipids

E. Antiseizure medications

89. Aşağıdakilerden hangisi hiperammonemi için bir tedavi DEĞİLDİR?

A. Laktuloz

B. Protein alımını artırın

C. Hemodiyaliz

D. Glikoz ve lipitlerin kalori alımını artırın

E. Antiepileptik ilaçlar

Cevap: B

90.* What is the treatment for acute calcific tendinitis of the longus colli muscle?

A. Surgical drainage

B. Intravenous antibiotics

C. Percutaneous drainage

D. Nonsteroidal anti-inflammatory drugs

E. Anticoagulation

90. Longus Kolli kasının akut kalsifik tendinitinin tedavisi nedir?

A. Cerrahi drenaj

B. İntravenöz antibiyotikler

C. Perkütan drenaj

D. Nonsteroidal antienflamatuvar ilaçlar

E. Antikoagülasyon

Cevap: D

91.* Which of the following is(are) a magnetic resonance imaging feature of osteochondritis dissecans instability?

I. Fluid imbibition deep to the lesion

II. Cortication around the lesion

III. Fragmentation of the subchondral plate

IV. Displacement or dislocation of the fragment

V. Bone marrow edema pattern

- 1. I, IV, V
  2. I, II, III, IV
  3. III, IV
  4. I, II, III, IV, V
  5. I, II

91. Aşağıdakilerden hangisi (hangileri) osteokondritis dissekans instabilitesinin manyetik rezonans görüntüleme özelliğidir?

I. Lezyonun derinliklerinde sıvı emilimi

II. Lezyon çevresinde kortikasyon

III. Subkondral plağın parçalanması

IV. Parçanın yer değiştirmesi veya yerinden çıkması

V. Kemik iliği ödemi paterni

- 1. I, IV, V
  2. I, II, III, IV
  3. III, IV
  4. I, II, III, IV, V
  5. I, II

Cevap:B

92.* What is the most common location of a Romanus lesion?

A. Cervical spine

B. Midthoracic spine

C. Thoracolumbar junction

D. Lower lumbar spine

E. SI joints

92. Romanus lezyonunun en sık görüldüğü yer neresidir?

A. Servikal omurga

B. Orta torasik omurga

C. Torakolomber bileşke

D. Alt lomber omurga

E. SI eklemleri

Cevap: C

93.* Which of the following are musculoskeletal manifestations of sickle cell disease? (Select ALL that apply.)

I. Osteomyelitis

II. Growth disturbance

III. Extramedullary hematopoiesis

IV. Malignancy

V. Skin ulceration

A. I, II, III, IV, V

B. I, II, III

C. I, II, III, V

D. I, V

E. II, IV

93. Aşağıdakilerden hangisi orak hücre hastalığının kas-iskelet sistemi belirtilerindendir? (Geçerli olan TÜMÜNÜ seçin.)

I. Osteomiyelit

II. Büyüme bozukluğu

III. Ekstramedüller hematopoez

IV. Malignite

V. Deri ülserasyonu

A. I, II, III, IV, V

B. I, II, III

C. I, II, III, V

D. I, V

E. II, IV

Cevap: C

94.* Which of the following is(are) true regarding rotator cuff calcific tendinosis? (Select ALL that apply.)

I. Painful disease is often associated with subdeltoid

bursitis.

II. The main treatment option is surgical resection.

III. Doppler hyperemia correlates with pain.

IV. There are formative, resting, and resorptive phases.

V. Calcific deposits can erode into bone.

- 1. I, III, IV, V
  2. IV, V
  3. I, III, IV
  4. III
  5. III, IV

94. Rotator manşet kalsifik tendinozu ile ilgili olarak aşağıdakilerden hangisi doğrudur? (Geçerli olan TÜMÜNÜ seçin.)

I. Ağrılı hastalık genellikle subdeltoid bursit ile ilişkilidir.

II. Ana tedavi seçeneği cerrahi rezeksiyondur.

III. Doppler hiperemi ağrı ile korelasyon gösterir.

IV. Oluşum, dinlenme ve rezorptif fazlar vardır.

V. Kalsifik birikintiler kemiğe aşınabilir.

- 1. I, III, IV, V
  2. IV, V
  3. I, III, IV
  4. III
  5. III, IV

Cevap: A

95.* Regarding gout, which of the following are correct?

(Select ALL that apply.)

I. Marginal osseous erosions with sclerotic margins and overhanging edges occur late in the disease process.

II. Sonographic features of gout include joint effusion, as well as echogenic deposits in the joint fluid, the synovium, and/or the cartilage surface.

II. Tophi are always intra-articular.

IV. Use of urate-lowering therapy increases the sensitivity and specificity of dual-energy computed tomography (CT) for the diagnosis of gout.

V. Tophi usually have the typical T1 hypointense, T2 hyperintense appearance of most masses

- - 1. II, III, IV
    2. II, III, IV, V
    3. I, II, V
    4. I, II
    5. IV, V

95. Gut hastalığı ile ilgili olarak aşağıdakilerden hangisi doğrudur?

(Geçerli olan TÜMÜNÜ seçin.)

I. Sklerotik kenarları ve sarkan kenarları olan marjinal osseöz erozyonlar hastalık sürecinin sonlarında ortaya çıkar.

II. Gut hastalığının sonografik özellikleri arasında eklem efüzyonunun yanı sıra eklem sıvısında, sinovyumda ve/veya kıkırdak yüzeyinde ekojenik birikintiler bulunur.

III. Tophi her zaman eklem içindedir.

IV. Ürat düşürücü tedavi kullanımı, gut tanısı için çift enerjili bilgisayarlı tomografinin (BT) duyarlılığını ve özgüllüğünü artırır.

V. Topi genellikle çoğu kitlenin tipik T1 hipointens, T2 hiperintens görünümüne sahiptir.

- - 1. II, III, IV
    2. II, III, IV, V
    3. I, II, V
    4. I, II
    5. IV, V

CEVAP: D

96.* Which of the following is the best modality for diagnosing a postoperative labral tear?

A. Magnetic resonance imaging (MRI)

B. MRI arthrogram

C. Noncontrast CT

D. Radiograph

E. Ultrasound

96. Aşağıdakilerden hangisi ameliyat sonrası labral yırtığın teşhisi için en iyi yöntemdir?

A. Manyetik rezonans görüntüleme (MRI)

B. MRI artrogramı

C. Kontrastsız BT

D. Radyografi

E. Ultrason

Cevap: B

97.* Which of the following is(are) correct regarding the magnetic resonance imaging (MRI) appearance of a discoid meniscus? (Select ALL that apply.)

I. Demonstrates continuity of the anterior and posterior horns on three or more contiguous 5-mm thick sagittal images

II. Occupies . 50% of the lateral femorotibial joint space

III. Often demonstrates diffusely increased meniscal signal intensity

IV. Presence of a meniscal tear increases the ability of MRI to accurately diagnose a discoid meniscus

V. Arthroscopic treatment may include saucerization and debulking

- 1. I, II, III, V
  2. I, II, IV
  3. IV, V
  4. I, II, III, IV, V
  5. V

97. Diskoid menisküsün manyetik rezonans görüntüleme (MRG) görünümü ile ilgili olarak aşağıdakilerden hangisi doğrudur? (Geçerli olan TÜMÜNÜ seçin.)

I. Üç veya daha fazla bitişik 5 mm kalınlığında sagital görüntüde ön ve arka boynuzların devamlılığını gösterir

II. Lateral femorotibial eklem aralığının %50'sini kaplar

III. Genellikle yaygın olarak artmış menisküs sinyal yoğunluğu gösterir

IV. Menisküs yırtığının varlığı, MRG'nin diskoid menisküsü doğru bir şekilde teşhis etme yeteneğini artırır

V. Artroskopik tedavi saucerizasyon ve debulking içerebilir

- 1. I, II, III, V
  2. I, II, IV
  3. IV, V
  4. I, II, III, IV, V
  5. V

Cevap A

98.* What is the mechanism of ulnar collateral ligament injury?

A. Hyperadduction

B. Hyperabduction

C. Axial loading

D. Hyperextension

E. Hyperflexion

98. Ulnar kollateral bağ yaralanmasının mekanizması nedir?

A. Hiperaddüksiyon

B. Hiperabdüksiyon

C. Aksiyal yükleme

D. Hiperekstansiyon

E. Hiperfleksiyon

Cevap: B

99.* What is the best next step in management for Lisfranc fracture-dislocation?

A. Surgical fixation

B. Closed reduction

C. Placing the patient in a walking boot

D. Repeat radiographs in 10 to 14 days

E. Ultrasound

99. Lisfranc kırığı-çıkığı tedavisinde bir sonraki en iyi adım nedir?

A. Cerrahi fiksasyon

B. Kapalı redüksiyon

C. Hastanın yürüme botuna yerleştirilmesi

D. Radyografileri 10 ila 14 gün içinde tekrarlayın

E. Ultrason

Cevap: A

100.* What are the imaging features of giant cell tumours of the tendon sheath on MRI?

(Multiple answers might be correct.)

I. Low T1-weighted and T2-weighted signal intensity

II. Low T1-weighted and high T2-weighted signal intensity

III. Low signal intensity on gradient echo, and may demonstrate blooming

IV. High T1-weighted and T2-weighted signal intensity

V. Might demonstrate enhancement post-intravenous contrast administration

- 1. I, III, IV, V
  2. I, III, V
  3. IV, V
  4. I, II, III
  5. I, II, V

100. Tendon kılıfının dev hücreli tümörlerinin MRG'deki görüntüleme özellikleri nelerdir?

(Birden fazla cevap doğru olabilir.)

I. Düşük T1 ağırlıklı ve T2 ağırlıklı sinyal yoğunluğu

II. Düşük T1 ağırlıklı ve yüksek T2 ağırlıklı sinyal yoğunluğu

III. Gradyan ekoda düşük sinyal yoğunluğu ve çiçeklenme gösterebilir

IV. Yüksek T1 ağırlıklı ve T2 ağırlıklı sinyal yoğunluğu

V. İntravenöz kontrast uygulaması sonrası artış gösterebilir.

- 1. I, III, IV, V
  2. I, III, V
  3. IV, V
  4. I, II, III
  5. I, II, V

Cevap: B

6.*
